# Supplementary figures and images for: Nanoscale dynamics of synaptic vesicle trafficking and fusion at the presynaptic active zone
Source: eLife journal article supplement (doi:10.7554/elife.13245), 2016-02-10

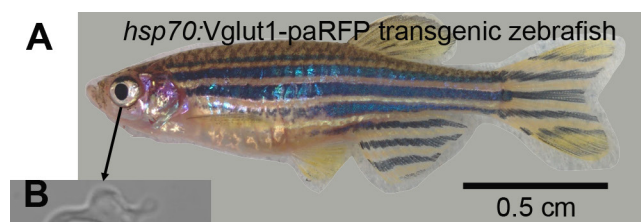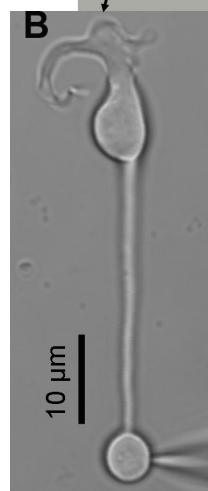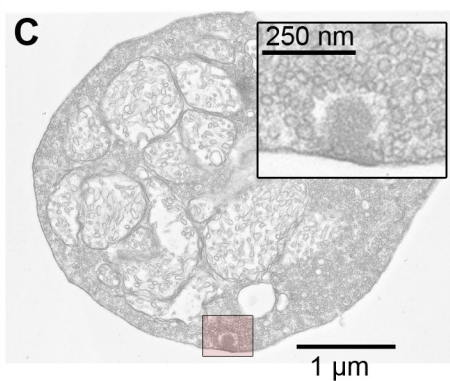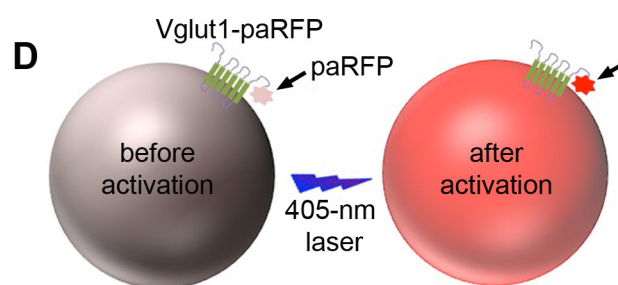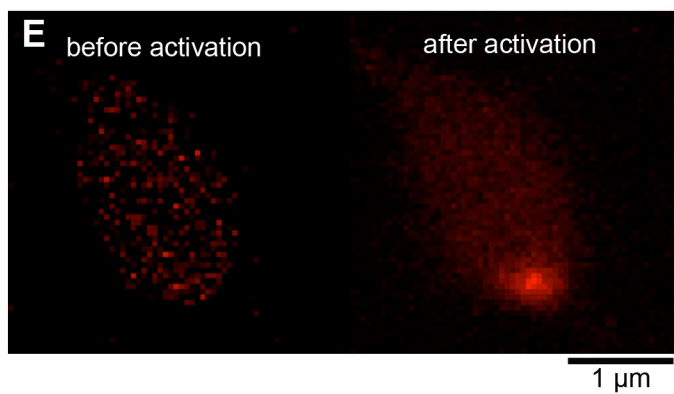

Supplement: supp [file elife_poa_e13245_Figure_1_figure_supplement_1.pdf › elife_poa_e13245_Figure_1_figure_supplement_1.pdf]

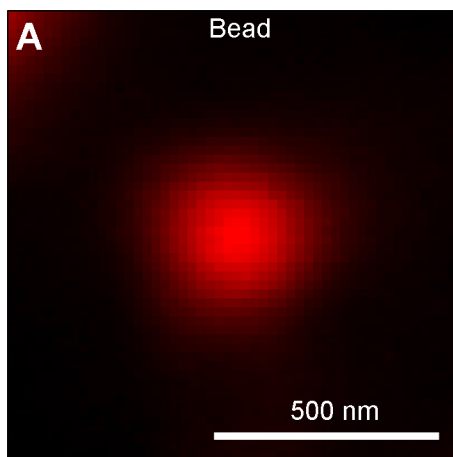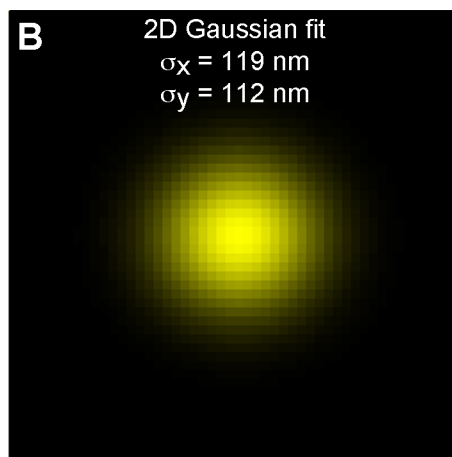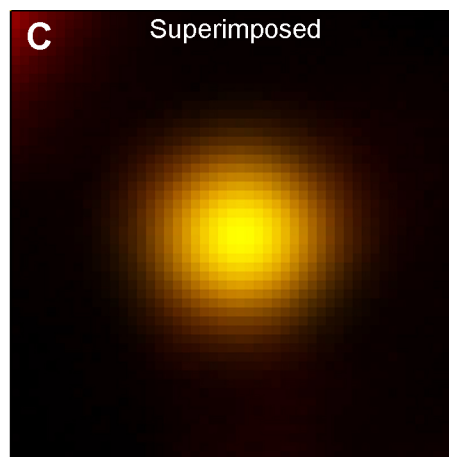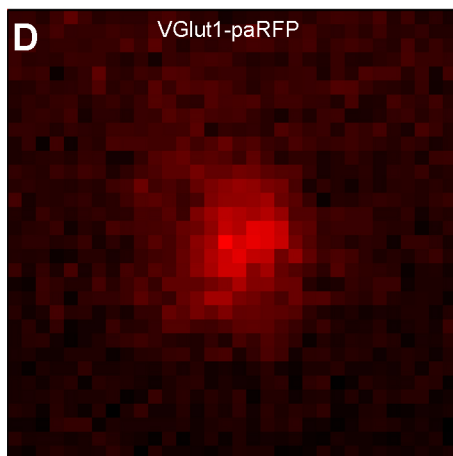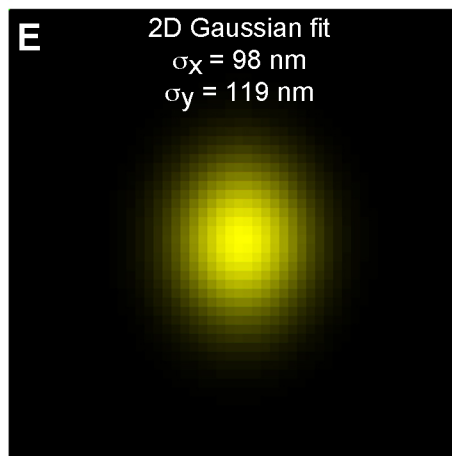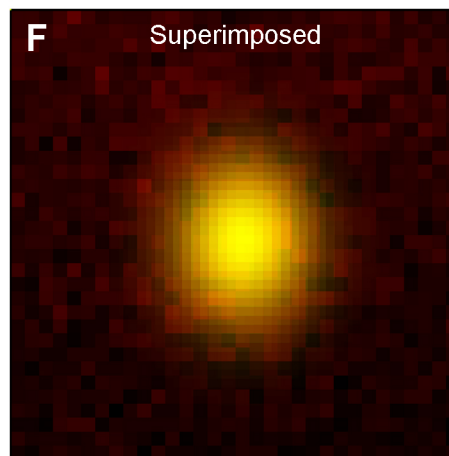

Supplement: supp [file elife_poa_e13245_Figure_1_figure_supplement_2.pdf › elife_poa_e13245_Figure_1_figure_supplement_2.pdf]

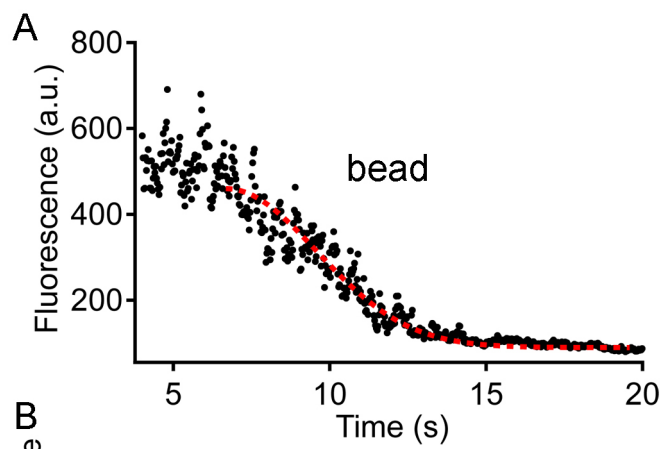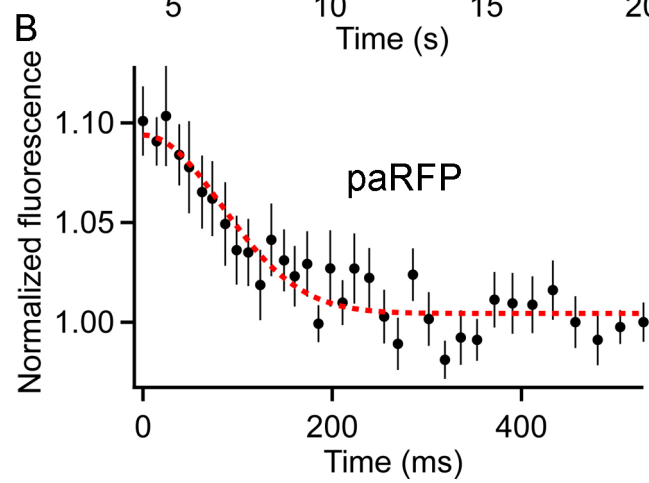

Supplement: supp [file elife_poa_e13245_Figure_4_figure_supplement_1.pdf › elife_poa_e13245_Figure_4_figure_supplement_1.pdf]

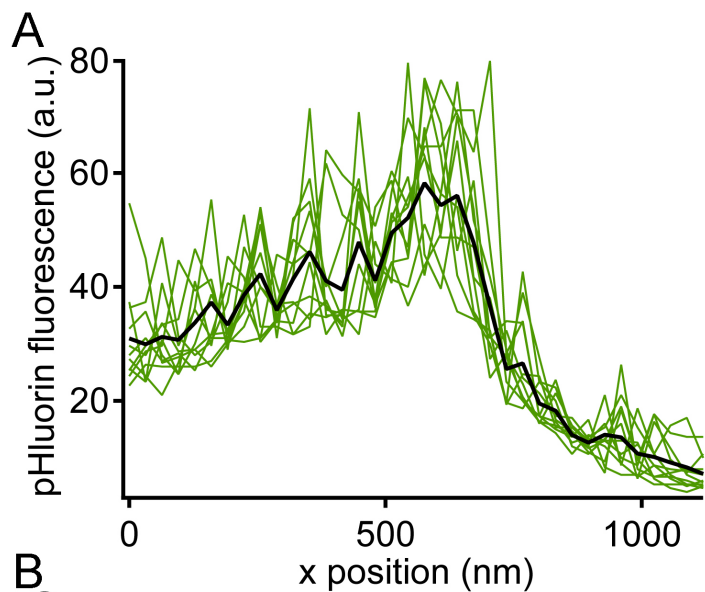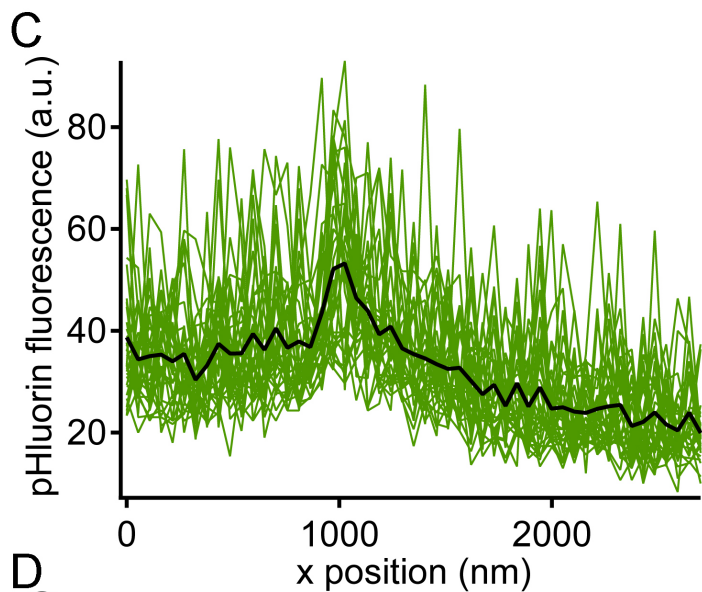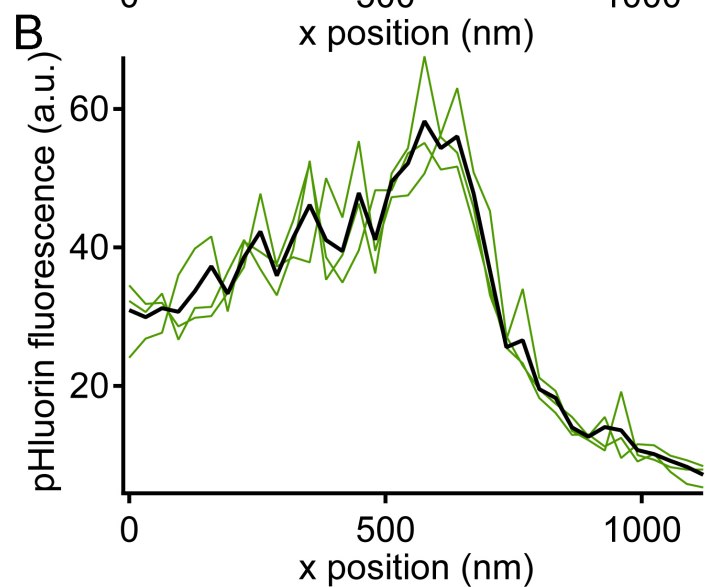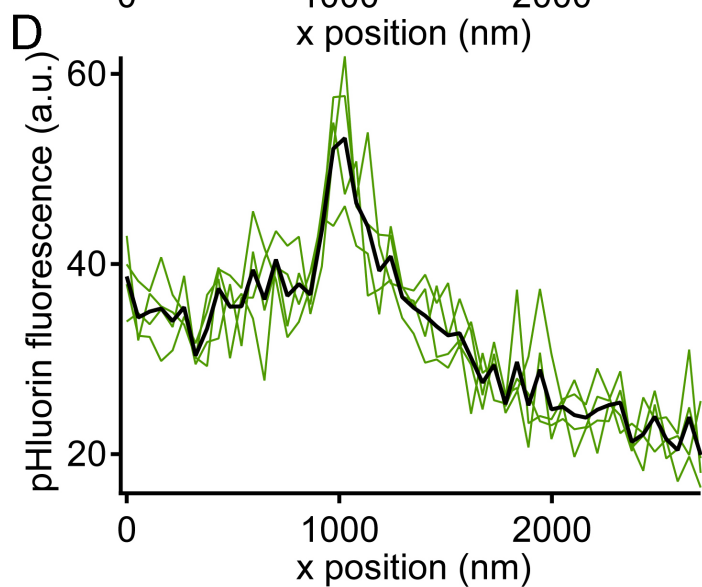

Supplement: supp [file elife_poa_e13245_Figure_5_figure_supplement_1.pdf › elife_poa_e13245_Figure_5_figure_supplement_1.pdf]

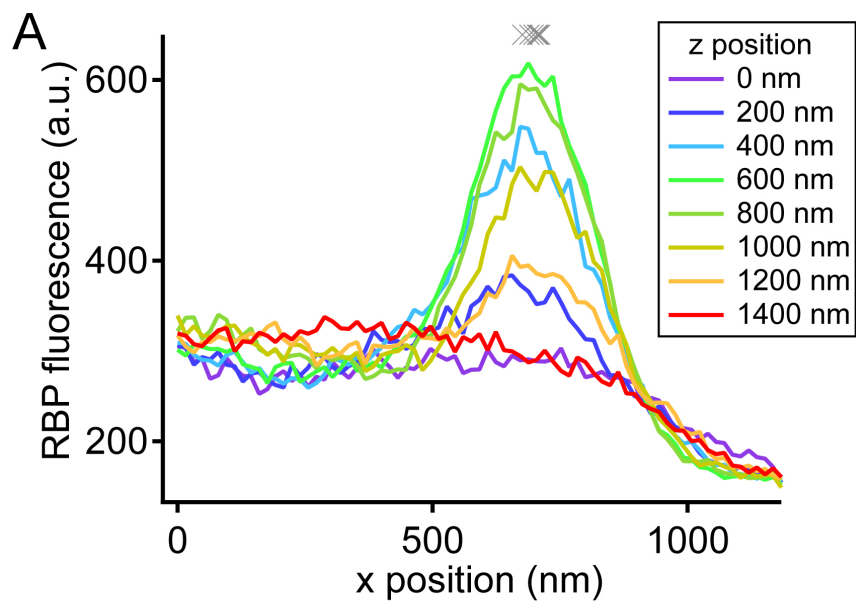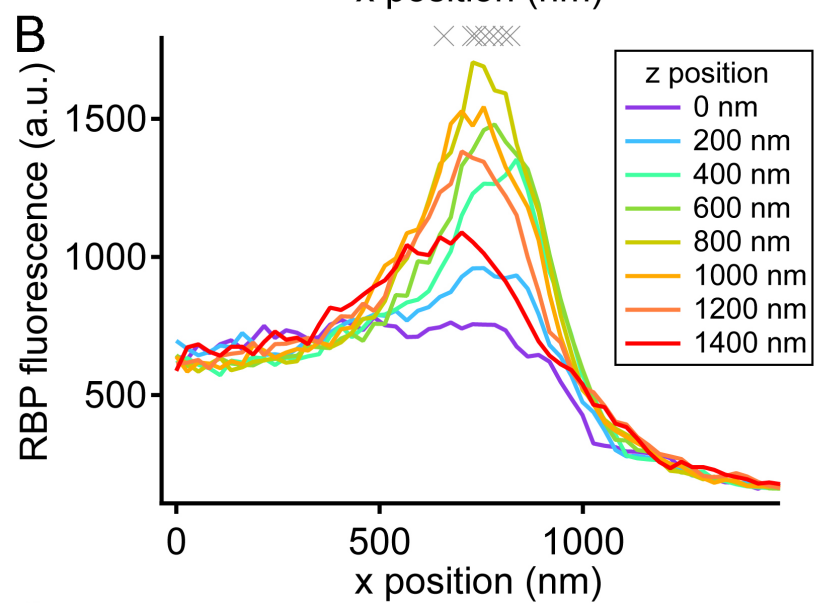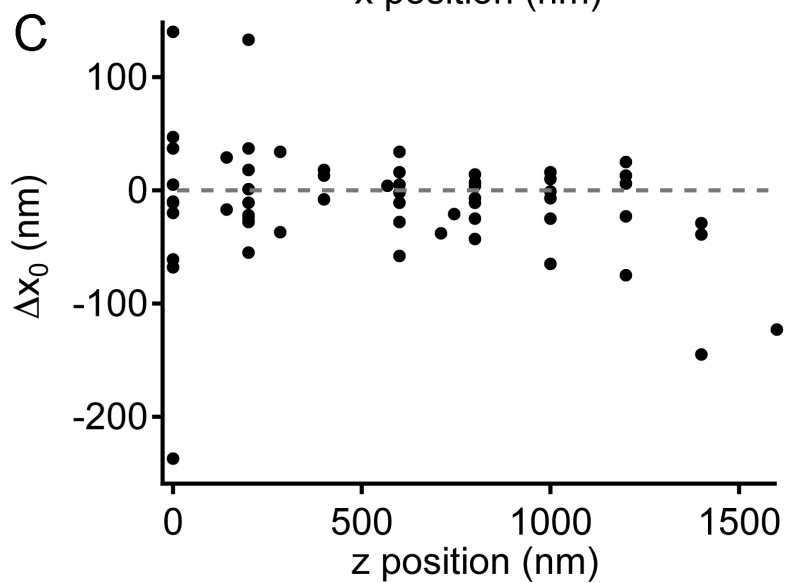

Supplement: supp [file elife_poa_e13245_Figure_5_figure_supplement_2.pdf › elife_poa_e13245_Figure_5_figure_supplement_2.pdf]
